# Supplementary material for: Effectiveness of cognitive–behavioural therapy: a protocol for an overview of systematic reviews and meta-analyses
Source: PubMed Central journal article supplement (PMC6303684; doi:10.1136/bmjopen-2018-025761), 2018-12-14

# BMJ Open

BMJ Open is committed to open peer review. As part of this commitment we make the peer review history of every article we publish publicly available.

When an article is published we post the peer reviewers' comments and the authors' responses online. We also post the versions of the paper that were used during peer review. These are the versions that the peer review comments apply to.

The versions of the paper that follow are the versions that were submitted during the peer review process. They are not the versions of record or the final published versions. They should not be cited or distributed as the published version of this manuscript.

BMJ Open is an open access journal and the full, final, typeset and author-corrected version of record of the manuscript is available on our site with no access controls, subscription charges or pay-per-view fees (<http://bmjopen.bmj.com>).

If you have any questions on BMJ Open's open peer review process please email [info.bmjopen@bmj.com](mailto:info.bmjopen@bmj.com)

# BMJ Open

## Effectiveness of Cognitive Behavioural Therapy: A protocol for an overview of systematic reviews and meta-analyses

|                               |                                                                                                                                                                                                                                                                                                                                                                                                                                                                                                                                                                                                                                                                                                                                                                                                                                          |
|-------------------------------|------------------------------------------------------------------------------------------------------------------------------------------------------------------------------------------------------------------------------------------------------------------------------------------------------------------------------------------------------------------------------------------------------------------------------------------------------------------------------------------------------------------------------------------------------------------------------------------------------------------------------------------------------------------------------------------------------------------------------------------------------------------------------------------------------------------------------------------|
| Journal:                      | <i>BMJ Open</i>                                                                                                                                                                                                                                                                                                                                                                                                                                                                                                                                                                                                                                                                                                                                                                                                                          |
| Manuscript ID                 | bmjopen-2018-025761                                                                                                                                                                                                                                                                                                                                                                                                                                                                                                                                                                                                                                                                                                                                                                                                                      |
| Article Type:                 | Protocol                                                                                                                                                                                                                                                                                                                                                                                                                                                                                                                                                                                                                                                                                                                                                                                                                                 |
| Date Submitted by the Author: | 02-Aug-2018                                                                                                                                                                                                                                                                                                                                                                                                                                                                                                                                                                                                                                                                                                                                                                                                                              |
| Complete List of Authors:     | Fordham, Beth; University of Oxford Nuffield Department of Orthopaedics Rheumatology and Musculoskeletal Sciences<br>Sugavanam, Thavapriya; University of Oxford Nuffield Department of Orthopaedics Rheumatology and Musculoskeletal Sciences,<br>Hopewell, Sally; University of Oxford, Centre for Statistics in Medicine, Nuffield Department of Orthopaedics, Rheumatology and Musculoskeletal Sciences<br>Hemming, Karla; University of Birmingham, Public Health<br>Howick, Jeremy; University of Oxford, Primary Care Health Sciences<br>Kirtley, Shona; University of Oxford, Centre for Statistics in Medicine<br>dasNair, Roshan; Institute of Mental Health, University of Nottingham<br>Hamer-Hunt, Julia<br>Lamb, Sarah; University of Oxford Nuffield Department of Orthopaedics Rheumatology and Musculoskeletal Sciences |
| Keywords:                     | Cognitive behaviour therapy, Overview of systematic reviews, MENTAL HEALTH, PSYCHIATRY                                                                                                                                                                                                                                                                                                                                                                                                                                                                                                                                                                                                                                                                                                                                                   |
|                               |                                                                                                                                                                                                                                                                                                                                                                                                                                                                                                                                                                                                                                                                                                                                                                                                                                          |

SCHOLARONE™  
Manuscripts

## Cognitive Behavioural Therapy: A protocol for an overview of systematic reviews and meta-analyses

Beth Fordham<sup>1</sup>, Thavapriya Sugavanam<sup>1</sup>, Sally Hopewell<sup>2</sup>, Karla Hemming<sup>3</sup>, Jeremy Howick<sup>4</sup>, Shona Kirtley<sup>2</sup>, Roshan das Nair<sup>5</sup>, Julia Hamer-Hunt<sup>6</sup>, and Sarah E Lamb<sup>1</sup>

Corresponding author: Beth Fordham [beth.fordham@ndorms.ox.ac.uk](mailto:beth.fordham@ndorms.ox.ac.uk)<sup>1</sup> Nuffield Department of Orthopaedics, Rheumatology and Musculoskeletal Sciences, University of Oxford, Botnar Research Centre, Windmill Road, Headington, Oxford OX3 7LD

Author affiliations:<sup>2</sup> Centre for Statistics in Medicine, Nuffield Department of Orthopaedics, Rheumatology and Musculoskeletal Sciences, University of Oxford. <sup>3</sup>Public Health, Epidemiology and Biostatistics, Institute of Applied Health Research, University of Birmingham. <sup>4</sup>Department of Primary Care Health Sciences, Centre for Evidence-Based Medicine, University of Oxford, <sup>5</sup>Institute of Mental Health, University of Nottingham, <sup>6</sup>Patient representative.

Email: Thavapriya Sugavanam [priya.sugavanam@ndorms.ox.ac.uk](mailto:priya.sugavanam@ndorms.ox.ac.uk), Sally Hopewell [sally.hopewell@csm.ox.ac.uk](mailto:sally.hopewell@csm.ox.ac.uk), Karla Hemming [K.Hemming@bham.ac.uk](mailto:K.Hemming@bham.ac.uk), Jeremy Howick [jeremy.howick@phc.ox.ac.uk](mailto:jeremy.howick@phc.ox.ac.uk), Shona Kirtley [shona.kirtley@csm.ox.ac.uk](mailto:shona.kirtley@csm.ox.ac.uk), Roshan das Nair [Roshan.Dasnair@nottingham.ac.uk](mailto:Roshan.Dasnair@nottingham.ac.uk), Julia Hamer-Hunt [julia.hamerhunt@gmail.com](mailto:julia.hamerhunt@gmail.com) and Sallie Lamb [sarah.lamb@ndorms.ox.ac.uk](mailto:sarah.lamb@ndorms.ox.ac.uk).

Authors' contributions: BF is the guarantor. PS developed the protocol with BF. SH provided expertise on design and methodology. KH provided expertise on methodology in particular panoramic meta-analysis. JH provided expertise in methodology. SK developed the draft search strategy plan. RdN, and JHH provided clinical contextual feedback. SL provided expertise in all areas of design, methodology and rigour. All authors read, provided feedback and approved the final manuscript.

Funding statement: This overview of systematic reviews is funded by the National Institute for Health Research, Health Technology Assessment Programme (funding reference number HTA 15/174: Cognitive Behavioural Therapy: An overview of systematic reviews and meta-analyses). The University of Oxford is the sponsor of this overview of systematic reviews. The NIHR HTA programme is funding this overview of systematic reviews. They will provide funding to NDORMS (University of Oxford) who will carry out the research and store the data. The NIHR HTA programme is not involved in any other aspect of the project design, data collection or analyses. They will be made aware of the findings at milestones throughout the project.

Acknowledgments: Professor Sallie Lamb receives funding from the National Institute for Health Research (NIHR) Collaboration for Leadership in Applied Health Research and Care Oxford at Oxford Health NHS Foundation Trust. The views expressed are those of the author(s) and not necessarily those of the NHS, the NIHR or the Department of Health and Social Care.

Competing Interests statement:  
No authors have any competing interests to declare.

Word count: 3557words

**Abstract**

**Introduction:** Cognitive behavioural therapy (CBT) is a psychological therapy which has been used to improve patient well-being across multiple mental and physical health problems. Its effectiveness has been examined in thousands of randomised control trials which have been synthesised into hundreds systematic reviews. The aim of this overview is to map, synthesise and assess the reliability of evidence generated from these systematic reviews of the effectiveness of CBT across all health conditions, patient groups and settings.

**Methods and analysis:** We will run our search strategy, to identify systematic reviews of CBT, within Database of Abstracts of Reviews of Effects, the Cochrane Library of Systematic Reviews, MEDLINE, EMBASE, PsycInfo, CINAHL, Child Development and Adolescent Studies and OpenGrey between January 1992 and 25<sup>th</sup> April 2018. Independent reviewers will sift, perform data extraction in duplicate and assess the quality of the reviews using the Assessing the Methodological Quality of Systematic Reviews (version.2) tool. The outcomes of interest include: health related quality of life, depression, anxiety and other psychological and physical/physiological outcomes prioritised in the individual reviews. The evidence will be mapped and synthesized where appropriate by health problem, patient sub-groups, intervention type, context and outcome.

**Ethics and dissemination:** Ethical approval is not required as this is an overview of published systematic reviews. We plan to publish results in peer reviewed journals, present at international and national academic, clinical and patient conferences.

**Registration details:**

Our protocol was registered with the International Prospective Register of Systematic Reviews (PROSPERO) on 17<sup>th</sup> April 2018 (registration number: CRD42017078690).

**Strengths and limitations of this study**

- A strength of this study is that it is the only up to date overview of systematic reviews examining randomised control trials of the effectiveness of Cognitive Behavioural Therapy across all health problems, populations and settings.
- Another strength is that our method allows us to map the available evidence and develop a framework to suggest where evidence can be generalised to and from.
- The main weakness is that we will only include systematic reviews which explicitly state, "Cognitive behavioural therapy" (including all synonyms) in their abstract, title or keywords. This excludes broader reviews which encapsulate the CBT within "psychological interventions."
- Another weakness is that, we are reliant on the information provided in the systematic reviews therefore we might omit RCTs if they are not included in the reviews we synthesis.

## 81 Introduction

82 The cognitive behavioural model theorises that when living with a physical or mental health problem the way  
83 in which we think and behave in response to the problem can influence our emotional and physical well-being  
84 and consequently our overall quality of life. The relationships between cognitions, behaviours, emotions and  
85 physical responses are all considered bidirectional<sup>1,2</sup>.

86  
87 Cognitive Behavioural Therapy (CBT) is a talking therapy, which targets identifying maladaptive thoughts and  
88 behaviours and challenging them, trying to develop different ways of thinking and acting to improve the  
89 emotional and physical outcomes for patients. CBT has a core set of competencies which can be applied trans-  
90 diagnostically, however it has also been tailored for use in specific populations, such as CBT-Insomnia. Most  
91 CBT is delivered in adherence with CBT process manuals specific to the health problem. Roth and Pilling, on  
92 behalf of the Department of Health, developed a set of core competencies for CBT and included a division  
93 between high and low intensity CBT<sup>3</sup>. They defined high intensity as formal CBT with a CBT-trained health  
94 professional predominantly delivered face to face in an individual or group format. Low intensity interventions  
95 focus on patient self-help and can be delivered by health professionals with very little to fairly comprehensive  
96 CBT training and via several platforms (internet, phone, paper-based). This distinction can become less clear in  
97 some forms of CBT, called “blended care”, where high intensity therapy is combined with low intensity self-  
98 help methods.

99  
100 The effectiveness of CBT has been evaluated with randomised control trials (RCTs), which have been  
101 synthesised into systematic reviews across numerous physical and mental health problems from  
102 schizophrenia<sup>4</sup> to low back pain<sup>5</sup>. We recognised some consistency across the CBT systematic reviews e.g.  
103 improving symptoms of insomnia in adults with various health problems<sup>6, 7, 8</sup>. However, we also identified  
104 areas with conflicting evidence for example with regards to the efficacy of CBT in reducing relapse in  
105 schizophrenia<sup>9,10</sup>.

106 Whilst we are cognisant the volume and variety of available systematic reviews of CBT we are not aware of the  
107 quality of the reviews conducted across different health problems, populations and settings. Another  
108 limitation of current evidence, is that short term changes to function as a result of CBT do not guarantee long  
109 term changes<sup>11,12</sup> and much of the evidence focuses on shorter term outcomes.

110 This overview will explore the effects of CBT across all health problems, in all populations and in all settings.  
111 The primary outcome will be Health Related Quality of Life (HRQL) with the aim of capturing, to some degree,  
112 the broader, general, biopsychosocial influence of CBT in addition to its impact upon the specific functional  
113 outcomes.

## 114 Rationale

115 Our scoping work suggests there are more than 500 systematic reviews of CBT and there has been no  
116 published overview of systematic reviews since 2004. We will address this gap, and aim to map for which  
117 populations there are systematic reviews of RCTs examining CBT and document how well these reviews were  
118 conducted. Within each population we will identify whether (a) there is a need for new or better quality  
119 systematic reviews or RCTs or (b) that CBT worsens/does not alter/improves generic (HRQL) and problem  
120 specific health outcomes in comparison to active or not active control conditions in the short or long term  
121 follow-up period.

## 122 Objectives

123 The specific objectives include:

- 124 (1) Stage one: A Map of the evidence
  - 125 a. Map and assess the quality of available evidence
- 126 (2) Stage two: A synthesis of the evidence
  - 127 a. A descriptive and a panoramic meta-analytic synthesis of the evidence (PMA) by ICD-11  
128 health problem categorisations and by common outcomes (HRQL, depression, anxiety and  
129 the most common physical/physiological outcome).

- 131 b. Sub-group analysis to explore high versus low intensity CBT (as defined by Roth and Pilling,  
132 2007<sup>3</sup>) for a health problem.

133 **Methods**

134 **Patient and Public Involvement**

135 We are working with a CBT expert consultation group (ECG) consisting of clinical academics (n=7), research  
136 academics (n=9) and service users (n=4). We meet with this group face to face twice and communicate via  
137 phone/email throughout the overview process to guide our protocol development, synthesis strategy, and  
138 interpretation. We hope the ECG will guide our overview to produce clinically meaningful outputs. The group  
139 will not be involved in any of the data extraction or quality assessment to ensure no undue influence.

140 **Methods**

141 We shall perform two stages within this overview. Stage one is to identify all the available systematic reviews  
142 of CBT, which include RCT evidence then to map the available evidence along with a quality assessment of the  
143 included reviews. The second stage will be to meaningfully synthesise the evidence by common outcomes  
144 across health problems and to specifically examine the comparative effectiveness of high and low intensity  
145 CBT.

146 **Stage one: Mapping the evidence**

147 This stage will detail how we will identify and select the systematic reviews for inclusion in order to generate a  
148 comprehensive map of the evidence.

149 **Eligibility criteria**

150 To be included in the evidence map and overview of systematic reviews, studies must meet the following  
151 criteria:

152  
153 Type of studies: We will include systematic reviews of randomised control trials (RCTs) which evaluate the  
154 effects of CBT. We will include systematic reviews which include both randomised and non-randomised trials  
155 so long as the review has summarised the RCT evidence independently.

156  
157 To be included, systematic reviews must fulfil a minimum of 4 methodological criteria as defined by the Centre  
158 for Reviews and Dissemination (CRD), University of York, as part of the Database of Reviews of Effects (DARE)  
159 database (<http://www.crd.york.ac.uk/crdweb>)<sup>13</sup>: (1) inclusion/exclusion criteria reported; (2) adequate search  
160 strategy; (3) included studies synthesised; (4) quality of the included studies assessed; (5) sufficient details  
161 about the included studies reported. The University of York have provided us with detailed definitions for each  
162 of these criteria. For example the minimum sufficient details of the individual studies would be details of the  
163 population, setting, interventions and results for every included study (in text, tables or online appendices).

164  
165 Type of participants: We will include systematic reviews of RCTs, which include data from all age groups and  
166 any gender. We will include all health problems recognised within the ICD-11.

167  
168 Setting: We will include systematic reviews of RCTs that have been conducted in any context or country.

169  
170 Intervention: We will only include systematic reviews where Cognitive Behavioural Therapy (or other CBT  
171 synonyms) has been explicitly reported in the review title, abstract or key words. We will include all formats of  
172 CBT. We will classify if the review's RCTs are employing high or low intensity CBT as defined by Roth and  
173 Pilling's Department of Health report<sup>3</sup>. High intensity CBT refers to face to face therapy with a relatively  
174 specialist trained CBT therapist and low intensity is all other types of CBT (blended care, guided self-help,  
175 internet-based, structured exercises or brief interventions).

176  
177 Comparator: We will include systematic reviews if they explore comparisons of CBT to either: 1) Active: a non-  
178 CBT comparator intervention 2) No Active: no intervention, waitlist control, placebo or treatment as usual or  
179 (3) Another format of CBT (e.g. computerised CBT versus face to face).

180

1  
2  
3 181 Outcomes: We will include systematic reviews which report information on at least one of the following  
4 182 patient or other reported outcomes: (1) HRQL (2) Psychological (3) Physical/physiological. We will include  
5 183 reviews with short (<12 months) and long term (>=12 months) outcomes.  
6 184

7 185 Restrictions: We will include only reviews that are published/available in the English language due to the  
8 186 limited study timescale. We shall only include reviews which were published after 1992.

### 187 **Information Sources**

188 Our method of identifying systematic reviews will be conducted according to the principles of the Cochrane  
189 Handbook for Systematic Reviews of Interventions<sup>14</sup> and recommendations for conducting Overviews of  
190 Systematic Reviews<sup>15</sup>.

191  
192 The search strategy will be run across the Database of Abstracts of Reviews of Effects (DARE: up to March  
193 2015), the Cochrane Library of Systematic Reviews, MEDLINE, EMBASE, PsycInfo, CINAHL, Child Development  
194 and Adolescent Studies (CDAS) and OpenGrey. This list was compiled by testing and searching the specificity  
195 and inclusivity of several databases and with the guidance of the ECG.

### 196 **Search Strategy**

197 A comprehensive search strategy comprising of free-text and controlled vocabulary terms identified by the  
198 ECG and from key papers from our preliminary scoping searches of systematic reviews on CBT will be run. We  
199 will use The Scottish Intercollegiate Guidelines Network (SIGN) systematic review filter available on the  
200 InterTASC Information Specialists' Sub-Group (ISSG) website<sup>16</sup>, across Medline, Embase and CINAHL. We will  
201 use the McMaster's filter<sup>17</sup> within PsycInfo.  
202

203 Our scoping work has identified that the earliest published review of CBT which has not been superseded is  
204 1992<sup>18</sup>. This year also saw the advent of the Cochrane Collaboration, which implements high quality systematic  
205 reviews of RCTs across health care. Therefore, we restrict our search to the last 26 years.

206 Our search strategy picked up 36/36 sensitivity check papers. The strategy was adapted and checked for use  
207 across each of our selected databases. Our MEDLINE search strategy is attached in Appendix A.  
208

209 We will perform an update search (April 2019) to check for any additional systematic reviews which have been  
210 published in the intervening year. We will also search PROSPERO, ClinicalTrials.gov and Clinical Trials Registry  
211 Platform (ICTRP) to identify any on-going systematic reviews and clinical trials to inform our discussion.

### 212 **Study records**

#### 213 **Data management**

214 Search results will be exported into Endnote for de-duplication and then exported into Covidence, as  
215 recommended by Cochrane<sup>19</sup>. The full-text of reviews shortlisted for full text analysis will also be uploaded to  
216 Covidence. We shall perform data extraction using Microsoft Excel.

#### 217 **Selection process**

218 Two reviewers will independently screen titles and abstracts using the abstract screening questionnaire which  
219 is based on the eligibility criteria. We will obtain full-text reports of those reviews selected for inclusion or for  
220 any uncertain cases. Two reviewers will independently perform review selection with the full text screening  
221 questionnaire, which includes the following reasons for exclusion (1) Not a systematic review, (2) Does not  
222 summarise RCT data separately (3) Does not report CBT specific data separately (4) CRD criteria (4 out of 5) not  
223 fulfilled (5) No HRQL, psychological or physical/physiological outcome (6) Full-text not available in English (7)  
224 Conference abstract with insufficient data. We will not contact authors for clarification. We will resolve any  
225 disagreements regarding the inclusion or exclusion of individual reviews by discussion with a third reviewer.  
226

227 The search process and study identification will be documented in a figure as recommended by PRISMA  
228 statement<sup>20</sup>. This will result in a final list of included and excluded systematic reviews along with reasons for  
229 exclusion. This process will not be blinded so all reviewers will be able to see the authors and their affiliated  
230 institutions.



**Data collection process**

We developed a bespoke data extraction form with the ECG. Two reviewers will pilot the form on the first 18 reviews from the sensitivity check for the search strategy and revise accordingly. Two reviewers will extract the review data items and perform the AMSTAR-2 quality assessment. A third reviewer will compare the duplicate extractions and the anomalies will be discussed until a decision is reached.

**Data items**

The information extracted for each review will include study ICD-11 category of disease (primary or secondary level), aims, study design (systematic review of RCT or systematic review of RCT and non-RCT), risk of bias (Note whether the review used a risk of bias measure), number of RCTs and number of participants, demographics, intervention and control group description (category (high or low intensity), number of RCTs and number of session/frequency, duration), setting, and whether the review included HRQoL, depression, anxiety or a physical/physiological outcome (description). We shall make a free text list of all available outcomes reported in the review, in addition to those we specifically target. Descriptive information on mechanism data, acceptability, satisfaction, adverse events and economic analyses will also be extracted, when available.

We shall therefore emphasise the importance of long term ( $\geq 12$  month follow-up) above short term ( $< 12$  month follow-up)

**Critical appraisal of included reviews**

Each systematic review will be assessed independently by two reviewers using the AMSTAR 2<sup>21</sup> tool. We will not reassess the quality of the individual included RCTs. We will calculate the rate of agreement between the two reviewers and report. We will resolve any discrepancies with a third reviewer. Guidance suggests there are seven critical domains within the AMSTAR-2 items<sup>21</sup> and suggests categorising a review with 'high' confidence in the results of the review if we find no critical weakness and no or only one non-critical weakness; 'moderate' confidence if more than one non-critical weakness with no critical weakness; 'low' if there is one critical weakness with or without non-critical weaknesses and 'critically low' if there is more than one critical weakness with or without non-critical weaknesses<sup>21</sup>.

**Evidence Map**

Overall map: We will produce a Bubble map<sup>22</sup> to represent the volume of systematic review data across all physical and mental health problems. The map will denote the total number of reviews (size of bubble), the total number of participants included in the reviews (y axis), the number of RCTs (x axis) by the primary physical or mental health (ICD-11 primary/secondary category) problem the review targets.

Mapping by health problem: Summary tables will present included review details grouped by ICD-11 categories. Information will include Intervention details, comparison group details, follow-up period, outcomes measured, effect size and confidence intervals for primary outcome / outcome pertaining to aim of review, number of RCTs, AMSTAR-2 rating, age and country. Within each health problem category we shall order reviews firstly by those which compared CBT to an active comparator and secondly those where it is compared to a non-active comparator.

Mapping by review details: The availability of the evidence will also be described by the following: (1) severity (mild, moderate, severe), (2) who (children, adults, older adults), (3) how (CBT intervention details), (4) when (prevention, standard treatment, relapse prevention etc), (5) where (primary, secondary, hospital setting), (6) psychological outcomes, (7) physiological outcomes and (8) HRQoL outcomes. The table aims to show the areas where systematic reviews have looked and where they have not. We propose to use the confidence ratings of AMSTAR-2<sup>21</sup> to code reviews with 'high confidence' (green), 'moderate confidence' (yellow), 'low confidence' (amber) and 'critically low' (red)<sup>23</sup>. This aims to give some direction as to the level of confidence.

278

**Stage two**

From the evidence maps populated in stage one we shall focus on the common outcomes examined within the included reviews. Stage two is to identify systematic reviews which we can synthesis to identify generic and specific effects of CBT across and within health problems.

283



## 284 **Outcomes and prioritisation**

### 285 Primary outcome

286 This overview will prioritise long term effects of CBT upon HRQL outcomes.

### 288 Secondary outcomes

289 Where no long term ( $\geq 12$  month) follow-up data is available we shall present the longest follow-up point  
290 available or the time point where the meta-analytic synthesis was performed. If there are separate analyses  
291 for several measurements of the same outcome then we will chose the analysis with the largest number of  
292 RCTs included. If they are equal then we will select the analysis of the measurement with the best  
293 psychometric properties.

294 We shall always extract data on HRQoL, depression, anxiety and one physical/physiological outcomes. If, in  
295 addition to or instead of HRQoL, depression and anxiety, there are multiple psychological and  
296 physical/physiological outcomes we will make a list of all available outcomes reported. If we find an additional  
297 common outcome, deemed meaningful by the ECG, which we have not focused on we can return to the review  
298 and extract this information.

299 If there are separate analyses for different classifications of response to treatment (response, recovery,  
300 relapse, remission) for the same outcome. We shall chose

- 301 ○ That which is identified as the primary outcome
- 302 ○ The analysis with the highest GRADE score (if available)
- 303 ○ The analysis which includes the greatest number of RCTs

304 Where available we will descriptively report the descriptions of mechanisms of action, patient satisfaction,  
305 adverse events and economic outcomes.

## 306 **Selection process**

307 We shall group all of the reviews which include a HRQoL outcome together. From these we shall identify those  
308 which have performed a meta-analysis of the data. These reviews shall be grouped by their ICD-11  
309 categorisation (i.e. Neoplasms). At this stage we shall check if any of the included systematic reviews, within a  
310 health problem category, share primary RCTs. If we identify two or more reviews, which are eligible for  
311 inclusion but share the same primary RCTs we will use the following criteria hierarchy to choose one review for  
312 inclusion into the overview:

- 313 1. The review with the highest AMSTAR rating
- 314 2. The most recent review
- 315 3. The review with the larger number of studies included

316 We shall return to the full text of reviews that are selected and extract effect sizes, confidence intervals and  
317 heterogeneity measures. For effect sizes based on continuous outcome measures, the combined  
318 intervention/control group means, standard deviations and the total number of participants per group shall be  
319 extracted. For binary outcomes we shall extract from the combined intervention/control group the number of  
320 participants who have achieved the desired outcome plus the total number of participants.

322 The selected reviews will be examined to identify those with moderate clinical, design and statistical  
323 homogeneity. Statistical heterogeneity in treatment effect estimates between health problems will be  
324 explored using the  $I^2$  statistic (moderate to low heterogeneity  $I^2$  less than 75%); clinical heterogeneity will be  
325 explored through discussion with the ECG; and design heterogeneity explored using AMSTAR-2 scores.

327 We shall repeat this process for all reviews which include a depression outcome and an anxiety outcome. We  
328 will list all the physical/physiological outcomes which have been examined across all of our included reviews.  
329 The outcome which is the most common will be identified as the fourth outcome for selection.

## 331 **Synthesis**

332 We will synthesise these reviews and provide pooled treatment effects for all reviews which include a (1)  
333 HRQoL outcome, (2) Depression outcome (3) anxiety outcome and (4) most common physical/physiological  
334 outcome.

335

1  
2  
3 336 This formal quantitative data synthesis will be undertaken using a two-step frequentist approach to a PMA.  
4 337 This method provides a single pooled estimate of the treatment effect along with estimates of degree of  
5 338 heterogeneity between reviews. This allows for both between study variability within the health problem (if  
6 339 random effects meta-analysis was used in the original indication review) and between health problem  
7 340 variability (using random effects), but does assume exchangeability of treatment effects.  
8 341

9 342 We will perform this process for the outcomes of HRQoL, depression, anxiety and the most common physical/  
10 343 physiological outcome. As we have collected other psychological and physical/physiological outcomes we will  
11 344 remain flexible and will consider additional synthesis suggested by the ECG.  
12 345

#### 12 346 Sub-group analysis:

13 347 For each of our key outcomes (HRQoL, depression, anxiety and the most common physical outcome) we will  
14 348 perform a sub-group analysis comparing (1) reviews which include RCTs with high intensity CBT (2) those with  
15 349 low intensity CBT, (3) those with a mixture of high and low intensity CBT RCTs. In addition, if we find reviews  
16 350 which directly compare high and low intensity CBT within the review we shall group these and if possible pool  
17 351 the results; comparing high to low intensity CBT groups rather than intervention to control groups.  
18 352

19 353 We do not plan to perform any further sub-group analyses however if the data is suitable we are flexible to  
20 354 additional analyses (e.g. by control group type or follow-up period) if the comparison is deemed important by  
21 355 the ECG once we have reviewed the available data.  
22

#### 22 356 **Publication bias**

23 357 This will be assessed per outcome therefore if we have more than 10 systematic reviews per outcome (HRQoL,  
24 358 Depression, Anxiety and the most common physical outcome) then the evidence of funnel plot asymmetry will  
25 359 be assessed using both the funnel plot and the Egger test using a conservative P-value of 0.1 to acknowledge  
26 360 the low power of this test.  
27

28 361

#### 29 362 **Summary**

30 363 We are sensitive to the importance of not overstating conclusions representing CBT as being effective or not  
31 364 and to accurately reflect where further research, whether primary or secondary analysis work is needed. We  
32 365 will caveat all summary statements and recommendations with the limitations of the methodology but treat  
33 366 this as a necessary step in addressing the current state of the CBT evidence base.  
34 367

35 368 The mapping exercise will identify in which health problems, across which sub-groups, contexts and with what  
36 369 format, CBT has been evaluated, thereby identifying gaps which have not been examined with a high quality  
37 370 systematic review.  
38 371

39 372 The synthesis stage can identify if CBT can produce long term changes in quality of life. It will also present, with  
40 373 varying degrees of confidence, where CBT does or does not produce generic or problem-specific long term  
41 374 changes upon specific functions.  
42 375

43 376 We will search Prospero, ClinicalTrials.gov and ICTRP to identify on-going trials or systematic reviews which  
44 377 have addressed the areas we recommend for further research. This summary will lead to a set of  
45 378 recommendations regarding the prioritisation of primary or secondary research into areas where we cannot  
46 379 generalise the clinical effectiveness findings and the evidence base is weak.  
47 380

#### 47 381 **Dissemination plan**

48 382 An overview of the project will be published in the NIHR journals library. We plan to prepare secondary  
49 383 publications detailing the generic effects of CBT upon HRQL, depression, anxiety and the most commonly  
50 384 found physical/physiological outcome. When there is sufficient data we will publish health problem specific  
51 385 overview papers. We hope to present the findings at international conferences to make sure the information is  
52 386 communicated to the patient population perhaps via patient conferences and/or social media.  
53 387

54 388  
55  
56  
57  
58  
59  
60

389 **References**

- 390 1. Grazebrook KaG, A. What are cognitive and/or behavioural psychotherapies. UKCP/BACP  
391 Mapping psychotherapy exercise. . 2005.
- 392 2. Mansell W. The seven C's of CBT: A consideration of the future challenges for cognitive  
393 behaviour therapy. *Behavioural and Cognitive Psychotherapy*. 2008;.36(6):pp.
- 394 3. Roth A, Pilling S. *The competencies required to deliver effective Cognitive and Behavioural  
395 Therapy for people with Depression and Anxiety disorders*. . London: Department of Health.;  
396 2007.
- 397 4. Lockwood C, Page T, Conroy-Hiller T. Effectiveness of individual therapy and group therapy  
398 in the treatment of schizophrenia. *International Journal of Evidence-Based Healthcare*.  
399 2004;.2(10):pp.
- 400 5. Richmond H, Hall AM, Copsey B, et al. The Effectiveness of Cognitive Behavioural Treatment  
401 for Non-Specific Low Back Pain: A Systematic Review and Meta-Analysis. *Plos One*.  
402 2015;10(8).
- 403 6. Ballesio A, Aquino MRJV, Feige B, et al. The effectiveness of behavioural and cognitive  
404 behavioural therapies for insomnia on depressive and fatigue symptoms: A systematic  
405 review and network meta-analysis. *Sleep Medicine Reviews*. 2018:114-129.
- 406 7. Brasure M, Fuchs E, MacDonald R, et al. Psychological and Behavioral Interventions for  
407 Managing Insomnia Disorder: An Evidence Report for a Clinical Practice Guideline by the  
408 American College of Physicians. *Ann Intern Med*. 2016;165(2):113-124.
- 409 8. Johnson JA, Rash JA, Campbell TS, et al. A systematic review and meta-analysis of  
410 randomized controlled trials of cognitive behavior therapy for insomnia (CBT-I) in cancer  
411 survivors. *Sleep Med Rev*. 2016;27:20-28.
- 412 9. Burns AM, Erickson DH, Brenner CA. Cognitive-behavioral therapy for medication-resistant  
413 psychosis: a meta-analytic review. *Psychiatr Serv*. 2014;65(7):874-880.
- 414 10. Cormac I, Jones C, Campbell C. Cognitive behaviour therapy for schizophrenia. *The Cochrane  
415 database of systematic reviews*. 2002(1):CD000524.
- 416 11. Durham RC CJ, Power KG, Sharp DM, Macdonald RR, Major KA, et al. Long-term outcome of  
417 cognitive behaviour therapy clinical trials in central Scotland.  
418 *Health Technol Assess*.9(42).
- 419 12. Perlis RH. Cognitive behavioural therapy has short term but not long term benefits in people  
420 with residual symptoms of depression. *Evidence-based mental health*. 2005;8(3):75.
- 421 13. CRD. *Undertaking Systematic Reviews of Research on Effectiveness: CRD's Guidance for  
422 Carrying Out or Commissioning Reviews (CRD Report 4) 2nd edn*. . York: NHS Centre for  
423 Reviews and Dissemination, University of York.; 2001.
- 424 14. Higgins JP, Green S. *Cochrane handbook for systematic reviews of interventions*. Vol 5: Wiley  
425 Online Library; 2008.
- 426 15. Cochrane. The Cochrane Comparing Multiple Interventions Group  
427 Accessed 6th Jan 2016.
- 428 16. ISSG. Filters to Identify Systematic Reviews. [https://sites.google.com/a/york.ac.uk/issg-  
429 search-filters-resource/filters-to-identify-systematic-reviews](https://sites.google.com/a/york.ac.uk/issg-search-filters-resource/filters-to-identify-systematic-reviews). Accessed 3 August, 2016.
- 430 17. University M. Search Strategies for PsycINFO in Ovid Syntax 2016;  
431 [https://hiru.mcmaster.ca/hiru/HIRU\\_Hedges\\_PsycINFO\\_Strategies.aspx](https://hiru.mcmaster.ca/hiru/HIRU_Hedges_PsycINFO_Strategies.aspx). Accessed 10  
432 January 2018.
- 433 18. Grossman PBaH, J N. Self-control interventions with internalizing disorders: A review and  
434 analysis. *School Psychology Review*. 1992;21(2):229-245.
- 435 19. Covidence. Covidence: Faster systematic reviews. <https://www.covidence.org/>. Accessed  
436 June, 2016.
- 437 20. Moher D, Liberati A, Tetzlaff J, Altman DG, Grp P. Preferred Reporting Items for Systematic  
438 Reviews and Meta-Analyses: The PRISMA Statement. *Plos Med*. 2009;6(7).

- 1  
2  
3 439 21. Shea BJ, Reeves BC, Wells G, et al. AMSTAR 2: a critical appraisal tool for systematic reviews  
4 440 that include randomised or non-randomised studies of healthcare interventions, or both.  
5 441 *BMJ*. 2017;358:j4008.  
6 442 22. Hempel S, Shekelle PG, Taylor SL, et al. Evidence map of mindfulness. *VA-ESP Project #05-*  
7 443 *226*. 2014.  
8 444 23. Shea R, Wells, Thuku, Hamel. AMSTAR 2: a critical appraisal tool for systematic reviews that  
9 445 include randomised or non-randomised studies of healthcare interventions, or both. *BMJ*.  
10 446 2017.  
11 447 24. Howick J, Glasziou P, Aronson JK. Evidence-based mechanistic reasoning. *J Roy Soc Med*.  
12 448 2010;103(11):433-441.

13  
14 449  
15 450

16  
17  
18  
19  
20  
21  
22  
23  
24  
25  
26  
27  
28  
29  
30  
31  
32  
33  
34  
35  
36  
37  
38  
39  
40  
41  
42  
43  
44  
45  
46  
47  
48  
49  
50  
51  
52  
53  
54  
55  
56  
57  
58  
59  
60

For peer review only

**Appendix A: Search Strategy for MEDLINE**

Database & platform: Ovid MEDLINE(R) Epub Ahead of Print, In-Process & Other Non-Indexed Citations, Ovid MEDLINE(R) Daily and Ovid MEDLINE(R) 1946 to Present

Search strategy development date: 9 March 2018

1. (cognitive adj2 behavio?r adj3 (therap\$ or theor\$ or intervention\$ or train\$ or treatment\$ or psychotherap\$ or programme\$ or program\$ or method\$ or approach\$)).ti,ab,kw.
2. (cognitive adj2 behavio?ral adj3 (therap\$ or theor\$ or intervention\$ or train\$ or treatment\$ or psychotherap\$ or programme\$ or program\$ or method\$ or approach\$)).ti,ab,kw.
3. CBT.ti,ab,kw.
4. Cognitive Therapy/
5. or/1-4
6. Meta-Analysis as Topic/
7. meta analy\$.tw.
8. metaanaly\$.tw.
9. Meta-Analysis/
10. (systematic adj (review\$1 or overview\$1)).tw.
11. exp Review Literature as Topic/
- 12 or/6-11
13. cochrane.ab.
14. embase.ab.
15. (psychlit or psyclit).ab.
16. (psychinfo or psycinfo).ab.
17. (cinahl or cinhal).ab.
18. science citation index.ab.
19. bids.ab.
20. cancerlit.ab.
21. or/13-20
22. reference list\$.ab.
23. bibliograph\$.ab.
24. hand-search\$.ab.
25. relevant journals.ab.
26. manual search\$.ab.
27. or/22-26
28. selection criteria.ab.

## Cognitive Behavioural Therapy: A protocol for an overview of systematic reviews and meta-analyses

1  
2  
3 29. data extraction.ab.  
4

5 30. 28 or 29  
6

7 31. Review/  
8

9 32. 30 and 31  
10

11 33. Comment/  
12

13 34. Letter/  
14

15 35. Editorial/  
16

17 36. animal/  
18

19 37. human/  
20

21 38. 36 and 37  
22

23 39. 36 not 38  
24

25 40. or/33-35,39  
26

27 41. 12 or 21 or 27 or 32  
28

29 42. 41 not 40  
30

31 43. 5 and 42  
32

33 44. limit 43 to yr="1992-2018"  
34  
35  
36  
37  
38  
39  
40  
41  
42  
43  
44  
45  
46  
47  
48  
49  
50  
51  
52  
53  
54  
55  
56  
57  
58  
59  
60

## PRISMA-P 2015 Checklist

This checklist has been adapted for use with protocol submissions to *Systematic Reviews* from Table 3 in Moher D et al: Preferred reporting items for systematic review and meta-analysis protocols (PRISMA-P) 2015 statement. *Systematic Reviews* 2015 4:1

| Section/topic                     | #  | Checklist item                                                                                                                                                                                  | Information reported                |                          | Line number(s)    |
|-----------------------------------|----|-------------------------------------------------------------------------------------------------------------------------------------------------------------------------------------------------|-------------------------------------|--------------------------|-------------------|
|                                   |    |                                                                                                                                                                                                 | Yes                                 | No                       |                   |
| <b>ADMINISTRATIVE INFORMATION</b> |    |                                                                                                                                                                                                 |                                     |                          |                   |
| <b>Title</b>                      |    |                                                                                                                                                                                                 |                                     |                          |                   |
| Identification                    | 1a | Identify the report as a protocol of a systematic review                                                                                                                                        | <input checked="" type="checkbox"/> | <input type="checkbox"/> | 1                 |
| Update                            | 1b | If the protocol is for an update of a previous systematic review, identify as such                                                                                                              | <input type="checkbox"/>            | <input type="checkbox"/> | Not applicable    |
| <b>Registration</b>               | 2  | If registered, provide the name of the registry (e.g., PROSPERO) and registration number in the Abstract                                                                                        | <input checked="" type="checkbox"/> | <input type="checkbox"/> | 64-66             |
| <b>Authors</b>                    |    |                                                                                                                                                                                                 |                                     |                          |                   |
| Contact                           | 3a | Provide name, institutional affiliation, and e-mail address of all protocol authors; provide physical mailing address of corresponding author                                                   | <input checked="" type="checkbox"/> | <input type="checkbox"/> | 4-21              |
| Contributions                     | 3b | Describe contributions of protocol authors and identify the guarantor of the review                                                                                                             | <input checked="" type="checkbox"/> | <input type="checkbox"/> | 23-27             |
| <b>Amendments</b>                 | 4  | If the protocol represents an amendment of a previously completed or published protocol, identify as such and list changes; otherwise, state plan for documenting important protocol amendments | <input type="checkbox"/>            | <input type="checkbox"/> | Not applicable    |
| <b>Support</b>                    |    |                                                                                                                                                                                                 |                                     |                          |                   |
| Sources                           | 5a | Indicate sources of financial or other support for the review                                                                                                                                   | <input checked="" type="checkbox"/> | <input type="checkbox"/> | 37-41             |
| Sponsor                           | 5b | Provide name for the review funder and/or sponsor                                                                                                                                               | <input checked="" type="checkbox"/> | <input type="checkbox"/> | 29-35             |
| Role of sponsor/funder            | 5c | Describe roles of funder(s), sponsor(s), and/or institution(s), if any, in developing the protocol                                                                                              | <input checked="" type="checkbox"/> | <input type="checkbox"/> | 34-35             |
| <b>INTRODUCTION</b>               |    |                                                                                                                                                                                                 |                                     |                          |                   |
| <b>Rationale</b>                  | 6  | Describe the rationale for the review in the context of what is already known                                                                                                                   | <input checked="" type="checkbox"/> | <input type="checkbox"/> | 112-118           |
| <b>Objectives</b>                 | 7  | Provide an explicit statement of the question(s) the review will address with reference to                                                                                                      | <input checked="" type="checkbox"/> | <input type="checkbox"/> | 107-110 & 119-128 |



| Section/topic                             | #   | Checklist item                                                                                                                                                                                                                              | Information reported                |                          | Line number(s) |
|-------------------------------------------|-----|---------------------------------------------------------------------------------------------------------------------------------------------------------------------------------------------------------------------------------------------|-------------------------------------|--------------------------|----------------|
|                                           |     |                                                                                                                                                                                                                                             | Yes                                 | No                       |                |
|                                           |     | participants, interventions, comparators, and outcomes (PICO)                                                                                                                                                                               |                                     |                          |                |
| <b>METHODS</b>                            |     |                                                                                                                                                                                                                                             |                                     |                          |                |
| <b>Eligibility criteria</b>               | 8   | Specify the study characteristics (e.g., PICO, study design, setting, time frame) and report characteristics (e.g., years considered, language, publication status) to be used as criteria for eligibility for the review                   | <input checked="" type="checkbox"/> | <input type="checkbox"/> | 145-181        |
| <b>Information sources</b>                | 9   | Describe all intended information sources (e.g., electronic databases, contact with study authors, trial registers, or other grey literature sources) with planned dates of coverage                                                        | <input checked="" type="checkbox"/> | <input type="checkbox"/> | 182-206        |
| <b>Search strategy</b>                    | 10  | Present draft of search strategy to be used for at least one electronic database, including planned limits, such that it could be repeated                                                                                                  | <input checked="" type="checkbox"/> | <input type="checkbox"/> | Appendix A     |
| <b>STUDY RECORDS</b>                      |     |                                                                                                                                                                                                                                             |                                     |                          |                |
| Data management                           | 11a | Describe the mechanism(s) that will be used to manage records and data throughout the review                                                                                                                                                | <input checked="" type="checkbox"/> | <input type="checkbox"/> | 207-211        |
| Selection process                         | 11b | State the process that will be used for selecting studies (e.g., two independent reviewers) through each phase of the review (i.e., screening, eligibility, and inclusion in meta-analysis)                                                 | <input checked="" type="checkbox"/> | <input type="checkbox"/> | 212-225        |
| Data collection process                   | 11c | Describe planned method of extracting data from reports (e.g., piloting forms, done independently, in duplicate), any processes for obtaining and confirming data from investigators                                                        | <input checked="" type="checkbox"/> | <input type="checkbox"/> | 226-230        |
| <b>Data items</b>                         | 12  | List and define all variables for which data will be sought (e.g., PICO items, funding sources), any pre-planned data assumptions and simplifications                                                                                       | <input checked="" type="checkbox"/> | <input type="checkbox"/> | 231-242        |
| <b>Outcomes and prioritization</b>        | 13  | List and define all outcomes for which data will be sought, including prioritization of main and additional outcomes, with rationale                                                                                                        | <input checked="" type="checkbox"/> | <input type="checkbox"/> | 278-299        |
| <b>Risk of bias in individual studies</b> | 14  | Describe anticipated methods for assessing risk of bias of individual studies, including whether this will be done at the outcome or study level, or both; state how this information will be used in data synthesis                        | <input checked="" type="checkbox"/> | <input type="checkbox"/> | 243-251        |
| <b>DATA</b>                               |     |                                                                                                                                                                                                                                             |                                     |                          |                |
| <b>Synthesis</b>                          | 15a | Describe criteria under which study data will be quantitatively synthesized                                                                                                                                                                 | <input checked="" type="checkbox"/> | <input type="checkbox"/> | 325-337        |
|                                           | 15b | If data are appropriate for quantitative synthesis, describe planned summary measures, methods of handling data, and methods of combining data from studies, including any planned exploration of consistency (e.g., $I^2$ , Kendall's tau) | <input checked="" type="checkbox"/> | <input type="checkbox"/> | 300-323        |
|                                           | 15c | Describe any proposed additional analyses (e.g., sensitivity or subgroup analyses, meta-                                                                                                                                                    | <input checked="" type="checkbox"/> | <input type="checkbox"/> | 339-348        |

1  
2  
3  
4  
5  
6  
7  
8  
9  
10  
11  
12  
13  
14  
15  
16  
17  
18  
19  
20  
21  
22  
23  
24  
25  
26  
27  
28  
29  
30  
31  
32  
33  
34  
35  
36  
37  
38  
39  
40  
41  
42  
43  
44  
45  
46  
47

| Section/topic                            | #   | Checklist item                                                                                                              | Information reported                |                          | Line number(s) |
|------------------------------------------|-----|-----------------------------------------------------------------------------------------------------------------------------|-------------------------------------|--------------------------|----------------|
|                                          |     |                                                                                                                             | Yes                                 | No                       |                |
|                                          |     | regression)                                                                                                                 |                                     |                          |                |
|                                          | 15d | If quantitative synthesis is not appropriate, describe the type of summary planned                                          | <input checked="" type="checkbox"/> | <input type="checkbox"/> | 253-271        |
| <b>Meta-bias(es)</b>                     | 16  | Specify any planned assessment of meta-bias(es) (e.g., publication bias across studies, selective reporting within studies) | <input checked="" type="checkbox"/> | <input type="checkbox"/> | 349-353        |
| <b>Confidence in cumulative evidence</b> | 17  | Describe how the strength of the body of evidence will be assessed (e.g., GRADE)                                            | <input checked="" type="checkbox"/> | <input type="checkbox"/> | 316-323        |

For peer review only

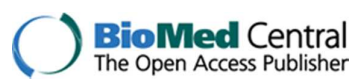

# BMJ Open

## Effectiveness of Cognitive Behavioural Therapy: A protocol for an overview of systematic reviews and meta-analyses

|                                 |                                                                                                                                                                                                                                                                                                                                                                                                                                                                                                                                                                                                                                                                                                                                                                                                                                       |
|---------------------------------|---------------------------------------------------------------------------------------------------------------------------------------------------------------------------------------------------------------------------------------------------------------------------------------------------------------------------------------------------------------------------------------------------------------------------------------------------------------------------------------------------------------------------------------------------------------------------------------------------------------------------------------------------------------------------------------------------------------------------------------------------------------------------------------------------------------------------------------|
| Journal:                        | <i>BMJ Open</i>                                                                                                                                                                                                                                                                                                                                                                                                                                                                                                                                                                                                                                                                                                                                                                                                                       |
| Manuscript ID                   | bmjopen-2018-025761.R1                                                                                                                                                                                                                                                                                                                                                                                                                                                                                                                                                                                                                                                                                                                                                                                                                |
| Article Type:                   | Protocol                                                                                                                                                                                                                                                                                                                                                                                                                                                                                                                                                                                                                                                                                                                                                                                                                              |
| Date Submitted by the Author:   | 08-Oct-2018                                                                                                                                                                                                                                                                                                                                                                                                                                                                                                                                                                                                                                                                                                                                                                                                                           |
| Complete List of Authors:       | Fordham, Beth; University of Oxford Nuffield Department of Orthopaedics Rheumatology and Musculoskeletal Sciences<br>Sugavanam, Thavapriya; University of Oxford Nuffield Department of Orthopaedics Rheumatology and Musculoskeletal Sciences, Hopewell, Sally; University of Oxford, Centre for Statistics in Medicine, Nuffield Department of Orthopaedics, Rheumatology and Musculoskeletal Sciences<br>Hemming, Karla; University of Birmingham, Public Health<br>Howick, Jeremy; University of Oxford, Primary Care Health Sciences<br>Kirtley, Shona; University of Oxford, Centre for Statistics in Medicine<br>dasNair, Roshan; Institute of Mental Health, University of Nottingham<br>Hamer-Hunt, Julia<br>Lamb, Sarah; University of Oxford Nuffield Department of Orthopaedics Rheumatology and Musculoskeletal Sciences |
| <b>Primary Subject Heading</b>: | Evidence based practice                                                                                                                                                                                                                                                                                                                                                                                                                                                                                                                                                                                                                                                                                                                                                                                                               |
| Secondary Subject Heading:      | Mental health, Health services research                                                                                                                                                                                                                                                                                                                                                                                                                                                                                                                                                                                                                                                                                                                                                                                               |
| Keywords:                       | Cognitive behaviour therapy, Overview of systematic reviews, MENTAL HEALTH                                                                                                                                                                                                                                                                                                                                                                                                                                                                                                                                                                                                                                                                                                                                                            |
|                                 |                                                                                                                                                                                                                                                                                                                                                                                                                                                                                                                                                                                                                                                                                                                                                                                                                                       |

SCHOLARONE™  
Manuscripts

## Effectiveness of Cognitive Behavioural Therapy: A protocol for an overview of systematic reviews and meta-analyses

Beth Fordham<sup>1</sup>, Thavapriya Sugavanam<sup>1</sup>, Sally Hopewell<sup>2</sup>, Karla Hemming<sup>3</sup>, Jeremy Howick<sup>4</sup>, Shona Kirtley<sup>2</sup>, Roshan das Nair<sup>5</sup>, Julia Hamer-Hunt<sup>6</sup>, and Sarah E Lamb<sup>1</sup>

**Corresponding author:** Beth Fordham [beth.fordham@ndorms.ox.ac.uk](mailto:beth.fordham@ndorms.ox.ac.uk)<sup>1</sup> Nuffield Department of Orthopaedics, Rheumatology and Musculoskeletal Sciences, University of Oxford, Botnar Research Centre, Windmill Road, Headington, Oxford OX3 7LD

**Author affiliations:** <sup>2</sup> Centre for Statistics in Medicine, Nuffield Department of Orthopaedics, Rheumatology and Musculoskeletal Sciences, University of Oxford. <sup>3</sup> Public Health, Epidemiology and Biostatistics, Institute of Applied Health Research, University of Birmingham. <sup>4</sup> Department of Primary Care Health Sciences, Centre for Evidence-Based Medicine, University of Oxford, <sup>5</sup> Institute of Mental Health, University of Nottingham, <sup>6</sup> Patient representative.

**Email:** Thavapriya Sugavanam [priya.sugavanam@ndorms.ox.ac.uk](mailto:priya.sugavanam@ndorms.ox.ac.uk), Sally Hopewell [sally.hopewell@csm.ox.ac.uk](mailto:sally.hopewell@csm.ox.ac.uk), Karla Hemming [K.Hemming@bham.ac.uk](mailto:K.Hemming@bham.ac.uk), Jeremy Howick [jeremy.howick@phc.ox.ac.uk](mailto:jeremy.howick@phc.ox.ac.uk), Shona Kirtley [shona.kirtley@csm.ox.ac.uk](mailto:shona.kirtley@csm.ox.ac.uk), Roshan das Nair [Roshan.Dasnair@nottingham.ac.uk](mailto:Roshan.Dasnair@nottingham.ac.uk), Julia Hamer-Hunt [julia.hamerhunt@gmail.com](mailto:julia.hamerhunt@gmail.com) and Sallie Lamb [sarah.lamb@ndorms.ox.ac.uk](mailto:sarah.lamb@ndorms.ox.ac.uk).

**Authors' contributions:** BF is the guarantor. TS developed the protocol with BF. SH provided expertise on design and methodology. KH provided expertise on methodology in particular panoramic meta-analysis. JH provided expertise in methodology. SK developed the draft search strategy plan. RdN, and JHH provided clinical contextual feedback. SL provided expertise in all areas of design, methodology and rigour. All authors read, provided feedback and approved the final manuscript.

**Funding statement:** This overview of systematic reviews is funded by the National Institute for Health Research, Health Technology Assessment Programme (funding reference number HTA 15/174: Cognitive Behavioural Therapy: An overview of systematic reviews and meta-analyses). The University of Oxford is the sponsor of this overview of systematic reviews. The NIHR HTA programme is funding this overview of systematic reviews. They will provide funding to NDORMS (University of Oxford) who will carry out the research and store the data. The NIHR HTA programme is not involved in any other aspect of the project design, data collection or analyses. They will be made aware of the findings at milestones throughout the project.

**Acknowledgments:** Professor Sallie Lamb receives funding from the National Institute for Health Research (NIHR) Collaboration for Leadership in Applied Health Research and Care Oxford at Oxford Health NHS Foundation Trust. The views expressed are those of the author(s) and not necessarily those of the NHS, the NIHR or the Department of Health and Social Care.

**Competing Interests statement:**  
No authors have any competing interests to declare.

**Word count:** 3557words

**Abstract**

**Introduction:** Cognitive behavioural therapy (CBT) is a psychological therapy which has been used to improve patient well-being across multiple mental and physical health problems. Its effectiveness has been examined in thousands of randomised control trials which have been synthesised into hundreds systematic reviews. The aim of this overview is to map, synthesise and assess the reliability of evidence generated from these systematic reviews of the effectiveness of CBT across all health conditions, patient groups and settings.

**Methods and analysis:** We will run our search strategy, to identify systematic reviews of CBT, within Database of Abstracts of Reviews of Effects, the Cochrane Library of Systematic Reviews, MEDLINE, EMBASE, PsycInfo, CINAHL, Child Development and Adolescent Studies and OpenGrey between January 1992 and 25<sup>th</sup> April 2018. Independent reviewers will sift, perform data extraction in duplicate and assess the quality of the reviews using the Assessing the Methodological Quality of Systematic Reviews (version.2) tool. The outcomes of interest include: health related quality of life, depression, anxiety, psychosis and physical/physiological outcomes prioritised in the individual reviews. The evidence will be mapped and synthesized where appropriate by health problem, patient sub-groups, intervention type, context and outcome.

**Ethics and dissemination:** Ethical approval is not required as this is an overview of published systematic reviews. We plan to publish results in peer reviewed journals, present at international and national academic, clinical and patient conferences.

**Registration details:**

Our protocol was registered with the International Prospective Register of Systematic Reviews (PROSPERO) on 17<sup>th</sup> April 2018 (registration number: CRD42017078690).

**Strengths and limitations of this study**

- A strength of this study is that it is the only up to date overview of systematic reviews examining randomised control trials of the effectiveness of Cognitive Behavioural Therapy across all health problems, populations and settings.
- Another strength is that our method allows us to map the available evidence and develop a framework to suggest where evidence can be generalised to and from.
- The main weakness is that we will only include systematic reviews which explicitly state, "Cognitive behavioural therapy" (including all synonyms) in their abstract, title or keywords. This excludes broader reviews which encapsulate the CBT within "psychological interventions."
- Another weakness is that, we are reliant on the information provided in the systematic reviews therefore we might omit RCTs if they are not included in the reviews we synthesis.

## 80 Introduction

81 The cognitive behavioural model theorises that the way in which we think and behave will influence our  
82 emotional and physical well-being and consequently our overall quality of life. The relationships between  
83 cognitions, behaviours, emotions and physical responses are all considered bidirectional<sup>1,2</sup>.

84  
85 Cognitive Behavioural Therapy (CBT) is a talking therapy, which targets identifying maladaptive thoughts and  
86 behaviours and challenging them, trying to develop different ways of thinking and acting to improve the  
87 emotional and physical outcomes for patients. CBT has a core set of competencies which can be applied trans-  
88 diagnostically, however it has also been tailored for use in specific populations, such as CBT-Insomnia. Most  
89 CBT is delivered in adherence with CBT process manuals specific to the health problem. Roth and Pilling, on  
90 behalf of the Department of Health, developed a set of core competencies for CBT and included a division  
91 between high and low intensity CBT<sup>3</sup>. They defined high intensity as formal CBT with a CBT-trained health  
92 professional predominantly delivered face to face in an individual or group format. Low intensity interventions  
93 focus on patient self-help and can be delivered by health professionals with very little to fairly comprehensive  
94 CBT training and via several platforms (internet, phone, paper-based). This distinction can become less clear in  
95 some forms of CBT, called "blended care", where high intensity therapy is combined with low intensity self-  
96 help methods.

97  
98 The effectiveness of CBT has been evaluated with randomised control trials (RCTs), which have been  
99 synthesised into systematic reviews across numerous physical and mental health problems from  
100 schizophrenia<sup>4</sup> to low back pain<sup>5</sup>. We recognised some consistency across the CBT systematic reviews e.g.  
101 improving symptoms of insomnia in adults with various health problems<sup>6, 7, 8</sup>. However, we also identified  
102 areas with conflicting evidence for example with regards to the efficacy of CBT in reducing relapse in  
103 schizophrenia<sup>9,10</sup>.

104 Whilst we are cognisant the volume and variety of available systematic reviews of CBT we are not aware of the  
105 quality of the reviews conducted across different health problems, populations and settings. Another  
106 limitation of current evidence, is that short term changes to function as a result of CBT do not guarantee long  
107 term changes<sup>11,12</sup> and much of the evidence focuses on shorter term outcomes.

108 This overview will explore the effects of CBT across all health problems, in all populations and in all settings.  
109 The primary outcome will be Health Related Quality of Life (HRQL) with the aim of capturing, to some degree,  
110 the broader, general, biopsychosocial influence of CBT in addition to its impact upon the specific functional  
111 outcomes.

## 112 Rationale

113 Our scoping work suggests there are more than 500 systematic reviews of CBT and there has been no  
114 published overview of systematic reviews since 2004. We will address this gap, and aim to map for which  
115 populations there are systematic reviews of RCTs examining CBT and document how well these reviews were  
116 conducted. Within each population we will identify whether (a) there is a need for new or better quality  
117 systematic reviews or RCTs or (b) that CBT worsens/does not alter/improves generic (HRQL) and problem  
118 specific health outcomes in comparison to active or not active control conditions in the short or long term  
119 follow-up period.

## 121 Objectives

122 The specific objectives include:

- 123 (1) Stage one: A Map of the evidence
  - 124 a. Map and assess the quality of available evidence
- 125 (2) Stage two: A synthesis of the evidence
  - 126 a. A descriptive and a panoramic meta-analytic synthesis of the evidence (PMA) by ICD-11  
127 health problem categorisations and by common outcomes (HRQL, depression, anxiety,  
128 psychosis and the most common physical/physiological outcome).
  - 129 b. Sub-group analysis to explore high versus low intensity CBT (as defined by Roth and Pilling,  
130 2007<sup>3</sup>) for a health problem.

**131 Methods****132 Patient and Public Involvement**

133 We are working with a CBT expert consultation group (ECG) consisting of clinical academics (n=7), research  
134 academics (n=9) and service users (n=4). We meet with this group face to face twice and communicate via  
135 phone/email throughout the overview process to guide our protocol development, synthesis strategy, and  
136 interpretation. We hope the ECG will guide our overview to produce clinically meaningful outputs. The group  
137 will not be involved in any of the data extraction or quality assessment to ensure no undue influence.

**138 Methods**

139 We shall perform two stages within this overview. Stage one is to identify all the available systematic reviews  
140 of CBT, which include RCT evidence then to map the available evidence along with a quality assessment of the  
141 included reviews. The second stage will be to meaningfully synthesise the evidence by common outcomes  
142 across health problems and to specifically examine the comparative effectiveness of high and low intensity  
143 CBT.

**144 Stage one: Mapping the evidence**

145 This stage will detail how we will identify and select the systematic reviews for inclusion in order to generate a  
146 comprehensive map of the evidence.

**147 Eligibility criteria**

148 To be included in the evidence map and overview of systematic reviews, studies must meet the following  
149 criteria:

151 Type of studies: We will include systematic reviews of randomised control trials (RCTs) which evaluate the  
152 effects of CBT. We will include systematic reviews which include both randomised and non-randomised trials  
153 so long as the review has summarised the RCT evidence independently.

155 To be included, systematic reviews must fulfil a minimum of 4 methodological criteria as defined by the Centre  
156 for Reviews and Dissemination (CRD), University of York, as part of the Database of Reviews of Effects (DARE)  
157 database (<http://www.crd.york.ac.uk/crdweb>)<sup>13</sup>: (1) inclusion/exclusion criteria reported; (2) adequate search  
158 strategy; (3) included studies synthesised; (4) quality of the included studies assessed; (5) sufficient details  
159 about the included studies reported. The University of York have provided us with detailed definitions for each  
160 of these criteria. For example the minimum sufficient details of the individual studies would be details of the  
161 population, setting, interventions and results for every included study (in text, tables or online appendices).

163 Type of participants: We will include systematic reviews of RCTs, which include data from all age groups and  
164 any gender. We will include all health problems recognised within the ICD-11.

166 Setting: We will include systematic reviews of RCTs that have been conducted in any context or country.

168 Intervention: We will only include systematic reviews where Cognitive Behavioural Therapy (or other CBT  
169 synonyms) has been explicitly reported in the review title, abstract or key words. We will include all formats of  
170 CBT. We will classify if the review's RCTs are employing high or low intensity CBT as defined by Roth and  
171 Pilling's Department of Health report<sup>3</sup>. High intensity CBT refers to face to face therapy with a relatively  
172 specialist trained CBT therapist and low intensity is all other types of CBT (blended care, guided self-help,  
173 internet-based, structured exercises or brief interventions).

175 Comparator: We will include systematic reviews if they explore comparisons of CBT to either: 1) Active: a non-  
176 CBT comparator intervention 2) No Active: no intervention, waitlist control, placebo or treatment as usual or  
177 (3) Another format of CBT (e.g. computerised CBT versus face to face).

179 Outcomes: We will include systematic reviews which report information on at least one of the following  
180 patient or other reported outcomes: (1) HRQL (2) Psychological (3) Physical/physiological. We will include  
181 reviews with short (<12 months) and long term (>=12 months) outcomes.

182



183 **Restrictions:** We will include only reviews that are published/available in the English language due to the  
184 limited study timescale. We shall only include reviews which were published after 1992.

### 185 **Information Sources**

186 Our method of identifying systematic reviews will be conducted according to the principles of the Cochrane  
187 Handbook for Systematic Reviews of Interventions<sup>14</sup> and recommendations for conducting Overviews of  
188 Systematic Reviews<sup>15</sup>.

189  
190 The search strategy will be run across the Database of Abstracts of Reviews of Effects (DARE: up to March  
191 2015), the Cochrane Library of Systematic Reviews, MEDLINE, EMBASE, PsycInfo, CINAHL, Child Development  
192 and Adolescent Studies (CDAS) and OpenGrey. This list was compiled by testing and searching the specificity  
193 and inclusivity of several databases and with the guidance of the ECG.

### 194 **Search Strategy**

195 A comprehensive search strategy comprising of free-text and controlled vocabulary terms identified by the  
196 ECG and from key papers from our preliminary scoping searches of systematic reviews on CBT will be run. We  
197 will use The Scottish Intercollegiate Guidelines Network (SIGN) systematic review filter available on the  
198 InterTASC Information Specialists' Sub-Group (ISSG) website<sup>16</sup>, across Medline, Embase and CINAHL. We will  
199 use the McMaster's filter<sup>17</sup> within PsycInfo.

200  
201 Our scoping work has identified that the earliest published review of CBT which has not been superseded is  
202 1992<sup>18</sup>. This year also saw the advent of the Cochrane Collaboration, which implements high quality systematic  
203 reviews of RCTs across health care. Therefore, we restrict our search to the last 26 years.

204 Our search strategy picked up 36/36 sensitivity check papers. The strategy was adapted and checked for use  
205 across each of our selected databases. Our MEDLINE search strategy is attached in Appendix A.

206  
207 We will perform an update search (April 2019) to check for any additional systematic reviews which have been  
208 published in the intervening year. We will also search PROSPERO, ClinicalTrials.gov and Clinical Trials Registry  
209 Platform (ICTRP) to identify any on-going systematic reviews and clinical trials to inform our discussion.

### 210 **Study records**

#### 211 **Data management**

212 Search results will be exported into Endnote for de-duplication and then exported into Covidence, as  
213 recommended by Cochrane<sup>19</sup>. The full-text of reviews shortlisted for full text analysis will also be uploaded to  
214 Covidence. We shall perform data extraction using Microsoft Excel.

#### 215 **Selection process**

216 Two reviewers will independently screen titles and abstracts using the abstract screening questionnaire which  
217 is based on the eligibility criteria. We will obtain full-text reports of those reviews selected for inclusion or for  
218 any uncertain cases. Two reviewers will independently perform review selection with the full text screening  
219 questionnaire, which includes the following reasons for exclusion (1) Not a systematic review, (2) Does not  
220 summarise RCT data separately (3) Does not report CBT specific data separately (4) CRD criteria (4 out of 5) not  
221 fulfilled (5) No HRQL, psychological or physical/physiological outcome (6) Full-text not available in English (7)  
222 Conference abstract with insufficient data. We will not contact authors for clarification. We will resolve any  
223 disagreements regarding the inclusion or exclusion of individual reviews by discussion with a third reviewer.

224  
225 The search process and study identification will be documented in a figure as recommended by PRISMA  
226 statement<sup>20</sup>. This will result in a final list of included and excluded systematic reviews along with reasons for  
227 exclusion. This process will not be blinded so all reviewers will be able to see the authors and their affiliated  
228 institutions.

#### 229 **Data collection process**

230 We developed a bespoke data extraction form with the ECG. Two reviewers will pilot the form on the first 18  
231 reviews from the sensitivity check for the search strategy and revise accordingly. Two reviewers will extract  
232 the review data items and perform the AMSTAR-2 quality assessment. A third reviewer will compare the  
233 duplicate extractions and the anomalies will be discussed until a decision is reached.

**Data items**

The information extracted for each review will include study ICD-11 category of disease (primary or secondary level), aims, study design (systematic review of RCT or systematic review of RCT and non-RCT), risk of bias (Note whether the review used a risk of bias measure), number of RCTs and number of participants, demographics, intervention and control group description (category (high or low intensity), number of RCTs and number of session/frequency, duration), setting, and whether the review included HRQoL, depression, anxiety, psychosis or a physical/physiological outcome (description). We shall make a free text list of all available outcomes reported in the review, in addition to those we specifically target. Descriptive information on mechanism data, acceptability, satisfaction, adverse events and economic analyses will also be extracted, when available.

We shall therefore emphasise the importance of long term ( $\geq 12$  month follow-up) above short term ( $< 12$  month follow-up)

**Critical appraisal of included reviews**

Each systematic review will be assessed independently by two reviewers using the AMSTAR 2<sup>21</sup> tool. We will not reassess the quality of the individual included RCTs. We will calculate the rate of agreement between the two reviewers and report. We will resolve any discrepancies with a third reviewer. Guidance suggests there are seven critical domains within the AMSTAR-2 items<sup>21</sup> and suggests categorising a review with 'high' confidence in the results of the review if we find no critical weakness and no or only one non-critical weakness; 'moderate' confidence if more than one non-critical weakness with no critical weakness; 'low' if there is one critical weakness with or without non-critical weaknesses and 'critically low' if there is more than one critical weakness with or without non-critical weaknesses<sup>21</sup>.

**Evidence Map**

Overall map: We will produce a Bubble map<sup>22</sup> to represent the volume of systematic review data across all physical and mental health problems. The map will denote the total number of reviews (size of bubble), the total number of participants included in the reviews (y axis), the number of RCTs (x axis) by the primary physical or mental health (ICD-11 primary/secondary category) problem the review targets.

Mapping by health problem: Summary tables will present included review details grouped by ICD-11 categories. Information will include Intervention details, comparison group details, follow-up period, outcomes measured, effect size and confidence intervals for primary outcome / outcome pertaining to aim of review, number of RCTs, AMSTAR-2 rating, age and country. Within each health problem category we shall order reviews firstly by those which compared CBT to an active comparator and secondly those where it is compared to a non-active comparator.

Mapping by review details: The availability of the evidence will also be described by the following: (1) severity (mild, moderate, severe), (2) who (children, adults, older adults), (3) how (CBT intervention details), (4) when (prevention, standard treatment, relapse prevention etc), (5) where (primary, secondary, hospital setting), (6) psychological outcomes, (7) physiological outcomes and (8) HRQoL outcomes. The table aims to show the areas where systematic reviews have looked and where they have not. We shall highlight any Individual Patient Data (IPD) meta-analyses. We propose to use the confidence ratings of AMSTAR-2<sup>21</sup> to code reviews with 'high confidence' (green), 'moderate confidence' (yellow), 'low confidence' (amber) and 'critically low' (red)<sup>23</sup>. This aims to give some direction as to the level of confidence.

**Stage two**

From the evidence maps populated in stage one we shall focus on the common outcomes examined within the included reviews. Stage two is to identify systematic reviews which we can synthesis to identify generic and specific effects of CBT across and within health problems.

**Outcomes and prioritisation**Primary outcome

This overview will prioritise long term effects of CBT upon HRQL outcomes.

Secondary outcomes

288 Where no long term (>= 12 month) follow-up data is available we shall present the longest follow-up point  
289 available or the time point where the meta-analytic synthesis was performed. If there are separate analyses  
290 for several measurements of the same outcome then we will chose the analysis with the largest number of  
291 RCTs included. If they are equal then we will select the analysis of the measurement with the best  
292 psychometric properties.

293 We shall always extract data on HRQoL, depression, anxiety, psychosis and one physical/physiological  
294 outcomes. If, in addition to or instead of HRQoL, depression, anxiety and psychosis there are multiple  
295 psychological and physical/physiological outcomes we will make a list of all available outcomes reported. If we  
296 find an additional common outcome, deemed meaningful by the ECG, which we have not focused on we can  
297 return to the review and extract this information.

298 If there are separate analyses for different classifications of response to treatment (response, recovery,  
299 relapse, remission) for the same outcome. We shall chose

- 300 ○ That which is identified as the primary outcome
- 301 ○ The analysis with the highest GRADE score (if available)
- 302 ○ The analysis which includes the greatest number of RCTs

303 Where available we will descriptively report the descriptions of mechanisms of action, patient satisfaction,  
304 adverse events and economic outcomes.

### 305 Selection process

306 We shall group all of the reviews which include a HRQoL outcome together. From these we shall identify those  
307 which have performed a meta-analysis of the data. These reviews shall be grouped by their ICD-11  
308 categorisation (i.e. Neoplasms). At this stage we shall check if any of the included systematic reviews, within a  
309 health problem category, share primary RCTs. If we identify two or more reviews, which are eligible for  
310 inclusion but share the same primary RCTs we will use the following criteria hierarchy to choose one review for  
311 inclusion into the overview:

- 312 1. The review with the highest AMSTAR rating
- 313 2. The most recent review
- 314 3. The review with the larger number of studies included

315 We shall return to the full text of reviews that are selected and extract effect sizes, confidence intervals and  
316 heterogeneity measures. For effect sizes based on continuous outcome measures, the combined  
317 intervention/control group means, standard deviations and the total number of participants per group shall be  
318 extracted. For binary outcomes we shall extract from the combined intervention/control group the number of  
319 participants who have achieved the desired outcome plus the total number of participants.

320 The selected reviews will be examined to identify those with moderate clinical, design and statistical  
321 homogeneity. Statistical heterogeneity in treatment effect estimates between health problems will be  
322 explored using the  $I^2$  statistic (moderate to low heterogeneity  $I^2$  less than 75%); clinical heterogeneity will be  
323 explored through discussion with the ECG; and design heterogeneity explored using AMSTAR-2 scores.

324 We shall repeat this process for all reviews which include a depression outcome, an anxiety outcome and a  
325 psychosis outcome. We will list all the physical/physiological outcomes which have been examined across all of  
326 our included reviews. The outcome which is the most common will be identified as the fifth outcome for  
327 selection.

### 331 Synthesis

332 We will synthesise these reviews and provide pooled treatment effects for all reviews which include a (1)  
333 HRQoL outcome, (2) Depression outcome (3) anxiety outcome (4) psychosis outcome and (5) most common  
334 physical/physiological outcome.

335 This formal quantitative data synthesis will be undertaken using a two-step frequentist approach to a PMA.  
336 This method provides a single pooled estimate of the treatment effect along with estimates of degree of  
337 heterogeneity between reviews. This allows for both between study variability within the health problem (if  
338

339 random effects meta-analysis was used in the original indication review) and between health problem  
340 variability (using random effects), but does assume exchangeability of treatment effects.

341  
342 We will perform this process for the outcomes of HRQoL, depression, anxiety, psychosis and the most common  
343 physical/ physiological outcome. As we have collected other psychological and physical/physiological  
344 outcomes we will remain flexible and will consider additional synthesis suggested by the ECG.

#### 345 Sub-group analysis:

346  
347 For each of our key outcomes (HRQoL, depression, anxiety, psychosis and the most common physical  
348 outcome) we will perform a sub-group analysis comparing (1) reviews which include RCTs with high intensity  
349 CBT (2) those with low intensity CBT, (3) those with a mixture of high and low intensity CBT RCTs. In addition, if  
350 we find reviews which directly compare high and low intensity CBT within the review we shall group these and  
351 if possible pool the results; comparing high to low intensity CBT groups rather than intervention to control  
352 groups.

353  
354 We do not plan to perform any further sub-group analyses however if the data is suitable we are flexible to  
355 additional analyses (e.g. by control group type or follow-up period) if the comparison is deemed important by  
356 the ECG once we have reviewed the available data.

#### 357 **Publication bias**

358 This will be assessed per outcome therefore if we have more than 10 systematic reviews per outcome (HRQoL,  
359 Depression, Anxiety, Psychosis and the most common physical outcome) then the evidence of funnel plot  
360 asymmetry will be assessed using both the funnel plot and the Egger test using a P-value of 0.1 to  
361 acknowledge the low power of this test.

362

#### 363 **Summary**

364 We are sensitive to the importance of not overstating conclusions representing CBT as being effective or not  
365 and to accurately reflect where further research, whether primary or secondary analysis work is needed. We  
366 will caveat all summary statements and recommendations with the limitations of the methodology but treat  
367 this as a necessary step in addressing the current state of the CBT evidence base.

368

369 The mapping exercise will identify in which health problems, across which sub-groups, contexts and with what  
370 format, CBT has been evaluated, thereby identifying gaps which have not been examined with a high quality  
371 systematic review.

372

373 The synthesis stage can identify if CBT can produce long term changes in quality of life. It will also present, with  
374 varying degrees of confidence, where CBT does or does not produce generic or problem-specific long term  
375 changes upon specific functions.

376

377 We will search Prospero, ClinicalTrials.gov and ICTRP to identify on-going, completed or published trials or  
378 systematic reviews which have addressed the areas we recommend for further research. This summary will  
379 lead to a set of recommendations regarding the prioritisation of primary or secondary research into areas  
380 where we cannot generalise the clinical effectiveness findings and the evidence base is weak.

381

#### 382 **Dissemination plan**

383 An overview of the project will be published in the NIHR journals library. We plan to prepare secondary  
384 publications detailing the generic effects of CBT upon HRQL, depression, anxiety, psychosis and the most  
385 commonly found physical/physiological outcome. When there is sufficient data we will publish health problem  
386 specific overview papers. We hope to present the findings at international conferences to make sure the  
387 information is communicated to the patient population perhaps via patient conferences and/or social media.

388

389

390 **References**

- 391 1. Grazebrook KaG, A. What are cognitive and/or behavioural psychotherapies. UKCP/BACP  
392 Mapping psychotherapy exercise. . 2005.
- 393 2. Mansell W. The seven C's of CBT: A consideration of the future challenges for cognitive  
394 behaviour therapy. *Behavioural and Cognitive Psychotherapy*. 2008;.36(6):pp.
- 395 3. Roth A, Pilling S. *The competencies required to deliver effective Cognitive and Behavioural  
396 Therapy for people with Depression and Anxiety disorders*. . London: Department of Health.;  
397 2007.
- 398 4. Lockwood C, Page T, Conroy-Hiller T. Effectiveness of individual therapy and group therapy  
399 in the treatment of schizophrenia. *International Journal of Evidence-Based Healthcare*.  
400 2004;.2(10):pp.
- 401 5. Richmond H, Hall AM, Copsey B, et al. The Effectiveness of Cognitive Behavioural Treatment  
402 for Non-Specific Low Back Pain: A Systematic Review and Meta-Analysis. *Plos One*.  
403 2015;10(8).
- 404 6. Ballesio A, Aquino MRJV, Feige B, et al. The effectiveness of behavioural and cognitive  
405 behavioural therapies for insomnia on depressive and fatigue symptoms: A systematic  
406 review and network meta-analysis. *Sleep Medicine Reviews*. 2018:114-129.
- 407 7. Brasure M, Fuchs E, MacDonald R, et al. Psychological and Behavioral Interventions for  
408 Managing Insomnia Disorder: An Evidence Report for a Clinical Practice Guideline by the  
409 American College of Physicians. *Ann Intern Med*. 2016;165(2):113-124.
- 410 8. Johnson JA, Rash JA, Campbell TS, et al. A systematic review and meta-analysis of  
411 randomized controlled trials of cognitive behavior therapy for insomnia (CBT-I) in cancer  
412 survivors. *Sleep Med Rev*. 2016;27:20-28.
- 413 9. Burns AM, Erickson DH, Brenner CA. Cognitive-behavioral therapy for medication-resistant  
414 psychosis: a meta-analytic review. *Psychiatr Serv*. 2014;65(7):874-880.
- 415 10. Cormac I, Jones C, Campbell C. Cognitive behaviour therapy for schizophrenia. *The Cochrane  
416 database of systematic reviews*. 2002(1):CD000524.
- 417 11. Durham RC CJ, Power KG, Sharp DM, Macdonald RR, Major KA, et al. Long-term outcome of  
418 cognitive behaviour therapy clinical trials in central Scotland.  
419 *Health Technol Assess*.9(42).
- 420 12. Perlis RH. Cognitive behavioural therapy has short term but not long term benefits in people  
421 with residual symptoms of depression. *Evidence-based mental health*. 2005;8(3):75.
- 422 13. CRD. *Undertaking Systematic Reviews of Research on Effectiveness: CRD's Guidance for  
423 Carrying Out or Commissioning Reviews (CRD Report 4) 2nd edn*. . York: NHS Centre for  
424 Reviews and Dissemination, University of York.; 2001.
- 425 14. Higgins JP, Green S. *Cochrane handbook for systematic reviews of interventions*. Vol 5: Wiley  
426 Online Library; 2008.
- 427 15. Cochrane. The Cochrane Comparing Multiple Interventions Group  
428 Accessed 6th Jan 2016.
- 429 16. ISSG. Filters to Identify Systematic Reviews. [https://sites.google.com/a/york.ac.uk/issg-  
430 search-filters-resource/filters-to-identify-systematic-reviews](https://sites.google.com/a/york.ac.uk/issg-search-filters-resource/filters-to-identify-systematic-reviews). Accessed 3 August, 2016.
- 431 17. University M. Search Strategies for PsycINFO in Ovid Syntax 2016;  
432 [https://hiru.mcmaster.ca/hiru/HIRU\\_Hedges\\_PsycINFO\\_Strategies.aspx](https://hiru.mcmaster.ca/hiru/HIRU_Hedges_PsycINFO_Strategies.aspx). Accessed 10  
433 January 2018.
- 434 18. Grossman PBaH, J N. Self-control interventions with internalizing disorders: A review and  
435 analysis. *School Psychology Review*. 1992;21(2):229-245.
- 436 19. Covidence. Covidence: Faster systematic reviews. <https://www.covidence.org/>. Accessed  
437 June, 2016.
- 438 20. Moher D, Liberati A, Tetzlaff J, Altman DG, Grp P. Preferred Reporting Items for Systematic  
439 Reviews and Meta-Analyses: The PRISMA Statement. *Plos Med*. 2009;6(7).

- 1  
2  
3 440 21. Shea BJ, Reeves BC, Wells G, et al. AMSTAR 2: a critical appraisal tool for systematic reviews  
4 441 that include randomised or non-randomised studies of healthcare interventions, or both.  
5 442 *BMJ*. 2017;358:j4008.  
6 443 22. Hempel S, Shekelle PG, Taylor SL, et al. Evidence map of mindfulness. *VA-ESP Project #05-*  
7 444 *226*. 2014.  
8 445 23. Shea R, Wells, Thuku, Hamel. AMSTAR 2: a critical appraisal tool for systematic reviews that  
9 446 include randomised or non-randomised studies of healthcare interventions, or both. *BMJ*.  
10 447 2017.  
11 448  
12 449

13  
14  
15  
16  
17  
18  
19  
20  
21  
22  
23  
24  
25  
26  
27  
28  
29  
30  
31  
32  
33  
34  
35  
36  
37  
38  
39  
40  
41  
42  
43  
44  
45  
46  
47  
48  
49  
50  
51  
52  
53  
54  
55  
56  
57  
58  
59  
60

For peer review only



**Appendix A: Search Strategy for MEDLINE**

Database & platform: Ovid MEDLINE(R) Epub Ahead of Print, In-Process & Other Non-Indexed Citations, Ovid MEDLINE(R) Daily and Ovid MEDLINE(R) 1946 to Present

Search strategy development date: 9 March 2018

1. (cognitive adj2 behavio?r adj3 (therap\$ or theor\$ or intervention\$ or train\$ or treatment\$ or psychotherap\$ or programme\$ or program\$ or method\$ or approach\$)).ti,ab,kw.
2. (cognitive adj2 behavio?ral adj3 (therap\$ or theor\$ or intervention\$ or train\$ or treatment\$ or psychotherap\$ or programme\$ or program\$ or method\$ or approach\$)).ti,ab,kw.
3. CBT.ti,ab,kw.
4. Cognitive Therapy/
5. or/1-4
6. Meta-Analysis as Topic/
7. meta analy\$.tw.
8. metaanaly\$.tw.
9. Meta-Analysis/
10. (systematic adj (review\$1 or overview\$1)).tw.
11. exp Review Literature as Topic/
12. or/6-11
13. cochrane.ab.
14. embase.ab.
15. (psychlit or psyclit).ab.
16. (psychinfo or psycinfo).ab.
17. (cinahl or cinhal).ab.
18. science citation index.ab.
19. bids.ab.
20. cancerlit.ab.
21. or/13-20
22. reference list\$.ab.
23. bibliograph\$.ab.
24. hand-search\$.ab.
25. relevant journals.ab.
26. manual search\$.ab.
27. or/22-26
28. selection criteria.ab.



## Cognitive Behavioural Therapy: A protocol for an overview of systematic reviews and meta-analyses

- 1
- 2
- 3 29. data extraction.ab.
- 4
- 5 30. 28 or 29
- 6
- 7 31. Review/
- 8
- 9 32. 30 and 31
- 10
- 11 33. Comment/
- 12
- 13 34. Letter/
- 14
- 15 35. Editorial/
- 16
- 17 36. animal/
- 18
- 19 37. human/
- 20
- 21 38. 36 and 37
- 22
- 23 39. 36 not 38
- 24
- 25 40. or/33-35,39
- 26
- 27 41. 12 or 21 or 27 or 32
- 28
- 29 42. 41 not 40
- 30
- 31 43. 5 and 42
- 32
- 33 44. limit 43 to yr="1992-2018"
- 34
- 35
- 36
- 37
- 38
- 39
- 40
- 41
- 42
- 43
- 44
- 45
- 46
- 47
- 48
- 49
- 50
- 51
- 52
- 53
- 54
- 55
- 56
- 57
- 58
- 59
- 60

## PRISMA-P 2015 Checklist

This checklist has been adapted for use with protocol submissions to *Systematic Reviews* from Table 3 in Moher D et al: Preferred reporting items for systematic review and meta-analysis protocols (PRISMA-P) 2015 statement. *Systematic Reviews* 2015 4:1

| Section/topic                     | #  | Checklist item                                                                                                                                                                                  | Information reported                |                          | Line number(s)    |
|-----------------------------------|----|-------------------------------------------------------------------------------------------------------------------------------------------------------------------------------------------------|-------------------------------------|--------------------------|-------------------|
|                                   |    |                                                                                                                                                                                                 | Yes                                 | No                       |                   |
| <b>ADMINISTRATIVE INFORMATION</b> |    |                                                                                                                                                                                                 |                                     |                          |                   |
| <b>Title</b>                      |    |                                                                                                                                                                                                 |                                     |                          |                   |
| Identification                    | 1a | Identify the report as a protocol of a systematic review                                                                                                                                        | <input checked="" type="checkbox"/> | <input type="checkbox"/> | 1                 |
| Update                            | 1b | If the protocol is for an update of a previous systematic review, identify as such                                                                                                              | <input type="checkbox"/>            | <input type="checkbox"/> | Not applicable    |
| <b>Registration</b>               | 2  | If registered, provide the name of the registry (e.g., PROSPERO) and registration number in the Abstract                                                                                        | <input checked="" type="checkbox"/> | <input type="checkbox"/> | 64-66             |
| <b>Authors</b>                    |    |                                                                                                                                                                                                 |                                     |                          |                   |
| Contact                           | 3a | Provide name, institutional affiliation, and e-mail address of all protocol authors; provide physical mailing address of corresponding author                                                   | <input checked="" type="checkbox"/> | <input type="checkbox"/> | 4-21              |
| Contributions                     | 3b | Describe contributions of protocol authors and identify the guarantor of the review                                                                                                             | <input checked="" type="checkbox"/> | <input type="checkbox"/> | 23-27             |
| <b>Amendments</b>                 | 4  | If the protocol represents an amendment of a previously completed or published protocol, identify as such and list changes; otherwise, state plan for documenting important protocol amendments | <input type="checkbox"/>            | <input type="checkbox"/> | Not applicable    |
| <b>Support</b>                    |    |                                                                                                                                                                                                 |                                     |                          |                   |
| Sources                           | 5a | Indicate sources of financial or other support for the review                                                                                                                                   | <input checked="" type="checkbox"/> | <input type="checkbox"/> | 37-41             |
| Sponsor                           | 5b | Provide name for the review funder and/or sponsor                                                                                                                                               | <input checked="" type="checkbox"/> | <input type="checkbox"/> | 29-35             |
| Role of sponsor/funder            | 5c | Describe roles of funder(s), sponsor(s), and/or institution(s), if any, in developing the protocol                                                                                              | <input checked="" type="checkbox"/> | <input type="checkbox"/> | 34-35             |
| <b>INTRODUCTION</b>               |    |                                                                                                                                                                                                 |                                     |                          |                   |
| <b>Rationale</b>                  | 6  | Describe the rationale for the review in the context of what is already known                                                                                                                   | <input checked="" type="checkbox"/> | <input type="checkbox"/> | 112-118           |
| <b>Objectives</b>                 | 7  | Provide an explicit statement of the question(s) the review will address with reference to                                                                                                      | <input checked="" type="checkbox"/> | <input type="checkbox"/> | 107-110 & 119-128 |

| Section/topic                             | #   | Checklist item                                                                                                                                                                                                                              | Information reported                |                          | Line number(s) |
|-------------------------------------------|-----|---------------------------------------------------------------------------------------------------------------------------------------------------------------------------------------------------------------------------------------------|-------------------------------------|--------------------------|----------------|
|                                           |     |                                                                                                                                                                                                                                             | Yes                                 | No                       |                |
|                                           |     | participants, interventions, comparators, and outcomes (PICO)                                                                                                                                                                               |                                     |                          |                |
| <b>METHODS</b>                            |     |                                                                                                                                                                                                                                             |                                     |                          |                |
| <b>Eligibility criteria</b>               | 8   | Specify the study characteristics (e.g., PICO, study design, setting, time frame) and report characteristics (e.g., years considered, language, publication status) to be used as criteria for eligibility for the review                   | <input checked="" type="checkbox"/> | <input type="checkbox"/> | 145-181        |
| <b>Information sources</b>                | 9   | Describe all intended information sources (e.g., electronic databases, contact with study authors, trial registers, or other grey literature sources) with planned dates of coverage                                                        | <input checked="" type="checkbox"/> | <input type="checkbox"/> | 182-206        |
| <b>Search strategy</b>                    | 10  | Present draft of search strategy to be used for at least one electronic database, including planned limits, such that it could be repeated                                                                                                  | <input checked="" type="checkbox"/> | <input type="checkbox"/> | Appendix A     |
| <b>STUDY RECORDS</b>                      |     |                                                                                                                                                                                                                                             |                                     |                          |                |
| Data management                           | 11a | Describe the mechanism(s) that will be used to manage records and data throughout the review                                                                                                                                                | <input checked="" type="checkbox"/> | <input type="checkbox"/> | 207-211        |
| Selection process                         | 11b | State the process that will be used for selecting studies (e.g., two independent reviewers) through each phase of the review (i.e., screening, eligibility, and inclusion in meta-analysis)                                                 | <input checked="" type="checkbox"/> | <input type="checkbox"/> | 212-225        |
| Data collection process                   | 11c | Describe planned method of extracting data from reports (e.g., piloting forms, done independently, in duplicate), any processes for obtaining and confirming data from investigators                                                        | <input checked="" type="checkbox"/> | <input type="checkbox"/> | 226-230        |
| <b>Data items</b>                         | 12  | List and define all variables for which data will be sought (e.g., PICO items, funding sources), any pre-planned data assumptions and simplifications                                                                                       | <input checked="" type="checkbox"/> | <input type="checkbox"/> | 231-242        |
| <b>Outcomes and prioritization</b>        | 13  | List and define all outcomes for which data will be sought, including prioritization of main and additional outcomes, with rationale                                                                                                        | <input checked="" type="checkbox"/> | <input type="checkbox"/> | 278-299        |
| <b>Risk of bias in individual studies</b> | 14  | Describe anticipated methods for assessing risk of bias of individual studies, including whether this will be done at the outcome or study level, or both; state how this information will be used in data synthesis                        | <input checked="" type="checkbox"/> | <input type="checkbox"/> | 243-251        |
| <b>DATA</b>                               |     |                                                                                                                                                                                                                                             |                                     |                          |                |
| <b>Synthesis</b>                          | 15a | Describe criteria under which study data will be quantitatively synthesized                                                                                                                                                                 | <input checked="" type="checkbox"/> | <input type="checkbox"/> | 325-337        |
|                                           | 15b | If data are appropriate for quantitative synthesis, describe planned summary measures, methods of handling data, and methods of combining data from studies, including any planned exploration of consistency (e.g., $I^2$ , Kendall's tau) | <input checked="" type="checkbox"/> | <input type="checkbox"/> | 300-323        |
|                                           | 15c | Describe any proposed additional analyses (e.g., sensitivity or subgroup analyses, meta-                                                                                                                                                    | <input checked="" type="checkbox"/> | <input type="checkbox"/> | 339-348        |

1  
2  
3  
4  
5  
6  
7  
8  
9  
10  
11  
12  
13  
14  
15  
16  
17  
18  
19  
20  
21  
22  
23  
24  
25  
26  
27  
28  
29  
30  
31  
32  
33  
34  
35  
36  
37  
38  
39  
40  
41  
42  
43  
44  
45  
46  
47

| Section/topic                            | #   | Checklist item                                                                                                              | Information reported                |                          | Line number(s) |
|------------------------------------------|-----|-----------------------------------------------------------------------------------------------------------------------------|-------------------------------------|--------------------------|----------------|
|                                          |     |                                                                                                                             | Yes                                 | No                       |                |
|                                          |     | regression)                                                                                                                 |                                     |                          |                |
|                                          | 15d | If quantitative synthesis is not appropriate, describe the type of summary planned                                          | <input checked="" type="checkbox"/> | <input type="checkbox"/> | 253-271        |
| <b>Meta-bias(es)</b>                     | 16  | Specify any planned assessment of meta-bias(es) (e.g., publication bias across studies, selective reporting within studies) | <input checked="" type="checkbox"/> | <input type="checkbox"/> | 349-353        |
| <b>Confidence in cumulative evidence</b> | 17  | Describe how the strength of the body of evidence will be assessed (e.g., GRADE)                                            | <input checked="" type="checkbox"/> | <input type="checkbox"/> | 316-323        |

For peer review only



Supplement: bmjopen-2018-025761.draft_revisions.pdf [file bmjopen-2018-025761.draft_revisions.pdf]
