# Supplementary material for: Effectiveness of cognitive–behavioural therapy: a protocol for an overview of systematic reviews and meta-analyses
Source: PubMed Central journal article supplement (PMC6303684; doi:10.1136/bmjopen-2018-025761), 2018-12-14
Supplement: bmjopen-2018-025761supp001.pdf [file bmjopen-2018-025761supp001.pdf]

### Appendix A: Search Strategy for MEDLINE

Database & platform: Ovid MEDLINE(R) Epub Ahead of Print, In-Process & Other Non-Indexed Citations, Ovid MEDLINE(R) Daily and Ovid MEDLINE(R) 1946 to Present

Search strategy development date: 9 March 2018

1. (cognitive adj2 behavio?r adj3 (therap\$ or theor\$ or intervention\$ or train\$ or treatment\$ or psychotherap\$ or programme\$ or program\$ or method\$ or approach\$)).ti,ab,kw.
2. (cognitive adj2 behavio?ral adj3 (therap\$ or theor\$ or intervention\$ or train\$ or treatment\$ or psychotherap\$ or programme\$ or program\$ or method\$ or approach\$)).ti,ab,kw.
3. CBT.ti,ab,kw.
4. Cognitive Therapy/
5. or/1-4
6. Meta-Analysis as Topic/
7. meta analy\$.tw.
8. metaanaly\$.tw.
9. Meta-Analysis/
10. (systematic adj (review\$1 or overview\$1)).tw.
11. exp Review Literature as Topic/
12. or/6-11
13. cochrane.ab.
14. embase.ab.
15. (psychlit or psyclit).ab.
16. (psychinfo or psycinfo).ab.
17. (cinahl or cinhal).ab.
18. science citation index.ab.
19. bids.ab.
20. cancerlit.ab.
21. or/13-20
22. reference list\$.ab.
23. bibliograph\$.ab.
24. hand-search\$.ab.
25. relevant journals.ab.
26. manual search\$.ab.
27. or/22-26
28. selection criteria.ab.

29. data extraction.ab.

30. 28 or 29

31. Review/

32. 30 and 31

33. Comment/

34. Letter/

35. Editorial/

36. animal/

37. human/

38. 36 and 37

39. 36 not 38

40. or/33-35,39

41. 12 or 21 or 27 or 32

42. 41 not 40

43. 5 and 42

44. limit 43 to yr="1992-2018"
